# Supplementary material for: Evidence of two deeply divergent co-existing mitochondrial genomes in the Tuatara reveals an extremely complex genomic organization
Source: PubMed Central journal article supplement (PMC7846811; doi:10.1038/s42003-020-01639-0), 2021-01-29
Supplement: 42003_2020_1639_MOESM2_ESM.pdf [file 42003_2020_1639_MOESM2_ESM.pdf]

## **Description of Additional Supplementary Files**

File Name: Supplementary Data 1

Description: Oxford Nanopore reads for LAI molecule 1 (M1). File contains 114 Oxford Nanopore mtDNA reads that were assigned to M1 based on a 5% difference cut off (see Methods: Oxford Nanopore data and evaluation of LAI). File is in fasta format.

File Name: Supplementary Data 2

Description: Oxford Nanopore reads for LAI molecule 2 (M2). File contains 32 Oxford Nanopore mtDNA reads that were assigned to M2 based on a 5% difference cut off (see Methods: Oxford Nanopore data and evaluation of LAI). File is in fasta format.
